# Supplementary material for: The Impact of Peer Educators or Community Health Workers on the Progress of the UNAIDS 90-90-90 Targets in Africa: A Systematic Review and Meta-Analysis Protocol
Source: MDPI journal article supplement (doi:10.3390/ijerph18083917), 2021-04-08
Supplement: s1 [file s1]

## ANNEXES

### Supplementary material 1: Full searching strategy by databases

#### *Medline searching strategy\**

| # | Concept          | Search strategy                                                                                                                                                                                                                                                                                                                                                                                                                                                                                                                                                                                                                                                                                                                                                                                                                                                                                     |
|---|------------------|-----------------------------------------------------------------------------------------------------------------------------------------------------------------------------------------------------------------------------------------------------------------------------------------------------------------------------------------------------------------------------------------------------------------------------------------------------------------------------------------------------------------------------------------------------------------------------------------------------------------------------------------------------------------------------------------------------------------------------------------------------------------------------------------------------------------------------------------------------------------------------------------------------|
| 1 | intervention     | ("peer educator" or "HIV patients" or "HIV expert patients" or "community health workers" or "health extension workers" or "adherence supporters").tw.                                                                                                                                                                                                                                                                                                                                                                                                                                                                                                                                                                                                                                                                                                                                              |
| 2 | UNAIDS -1        | (HIV care" or "HIV care continuum" or "HIV care cascade" or "first 90" or "hiv diagnos*" or "hiv test*" or "hiv infection" or test* or diagnose or diagnosis or diagnoses or diagnosed or diagnosing or diagnostic or sero-diagnosis or serodiagnosis or prevent* or screen* or "voluntary counseling" or "voluntary counselling" or counseling or counselling or vct).tw.                                                                                                                                                                                                                                                                                                                                                                                                                                                                                                                          |
| 3 | UNAIDS -2        | ("second 90" or adherence or retention or attrition or compliance or "hiv care" or "antiretroviral therapy care" or "HIV treatment" or "antiretroviral therapy care" or "ART initiation" or "ART linkage" or "hiv care link*" or "linkages to care" or LTFU or discontinuation or defaulting or "loss to follow-up" or "loss to follow up" or "lost to follow-up" or "lost to follow up" or "loss-to-follow-up" or "lost-to-follow-up" or "loss to retention" or "lost to retention" or "treatment initiation" or retention or retain* or attrition or link* or "link to care" or "link to treatment" or "linkage to care" or "linkage to treatment" or "link into care" or "linkage into care" or "linkage into care" or "linkage into treatment" or eligibility or eligible or eligib* or adher* or complian* or comply or complied or noncomplan* or non-complan* or non-adher* or nonadher).tw. |
| 4 | UNAIDS -3        | ("third 90" or "viral suppression" or "virological failure" or "clinical failure" or "clinical success" or "immunological failure" or "immunological success" or "treatment failure" or "treatment success").tw.                                                                                                                                                                                                                                                                                                                                                                                                                                                                                                                                                                                                                                                                                    |
| 5 |                  | 2 or 3 or 4                                                                                                                                                                                                                                                                                                                                                                                                                                                                                                                                                                                                                                                                                                                                                                                                                                                                                         |
| 6 | HIV/AIDS and ART | (hiv or ART or "antiretroviral therapy" or "triple therapy" or HAART or AIDS or UNAIDS or "UNAIDS 90-90-90" or "UN targets" or "HIV Infections" or HIV or "human immunodeficiency virus" or "human immuno deficiency virus" or "human immune deficiency virus" or "human immunodeficiency virus" or "acquired immunodeficiency syndrome" or "acquired immuno deficiency syndrome" or "acquired immune deficiency syndrome" or "acquired immunodeficiency syndrome").tw.                                                                                                                                                                                                                                                                                                                                                                                                                             |
| 7 | Africa           | (Africa or "sub-Saharan Africa" or "list of all African countries")                                                                                                                                                                                                                                                                                                                                                                                                                                                                                                                                                                                                                                                                                                                                                                                                                                 |
| 8 |                  | 1 and 5 and 6 and 7; Limited by language (English) and year (2003-2020)                                                                                                                                                                                                                                                                                                                                                                                                                                                                                                                                                                                                                                                                                                                                                                                                                             |

**PubMed searching strategy\***

| # | Concept          | Search strategy                                                                                                                                                                                                                                                                                                                                                                                                                                                                                                                                                                                                                                                                                                                                                                            |
|---|------------------|--------------------------------------------------------------------------------------------------------------------------------------------------------------------------------------------------------------------------------------------------------------------------------------------------------------------------------------------------------------------------------------------------------------------------------------------------------------------------------------------------------------------------------------------------------------------------------------------------------------------------------------------------------------------------------------------------------------------------------------------------------------------------------------------|
| 1 | intervention     | (intervention OR solution OR program OR programme OR strateg* OR polic* OR approach OR evaluation OR promot*)                                                                                                                                                                                                                                                                                                                                                                                                                                                                                                                                                                                                                                                                              |
| 2 | UNAIDS -1        | ("first 90" OR "hiv diagnos*" OR "hiv test*" OR "hiv infection" OR test* OR diagnose OR diagnosis OR diagnoses OR diagnosed OR diagnosing OR diagnostic OR sero-diagnosis OR serodiagnosis OR prevent* OR screen* OR "voluntary counseling" OR "voluntary counselling" OR counseling OR counselling OR vct)                                                                                                                                                                                                                                                                                                                                                                                                                                                                                |
| 3 | UNAIDS -2        | ("second 90" OR adherence OR retention OR attrition OR compliance OR "hiv care" OR "ART linkage" OR "hiv care link*" OR "linkages to care" OR LTFU OR discontinuation OR defaulting OR "loss to follow-up" OR "loss to follow up" OR "lost to follow-up" OR "lost to follow up" OR "loss-to-follow-up" OR "lost-to-follow-up" OR "loss to retention" OR "lost to retention" OR "treatment initiation" OR retention OR retain* OR attrition OR link* OR "link to care" OR "link to treatment" OR "linkage to care" OR "linkage to treatment" OR "link into care" OR "linkage into care" OR "linkage into care" OR "linkage into treatment" OR eligibility OR eligible OR eligib* OR adher* OR complian* OR comply OR complied OR noncompliant* OR non-compliant* OR non-adher* OR nonadher) |
| 4 | UNAIDS -3        | ("third 90" OR "viral suppression" OR "virological failure" OR "clinical failure" OR "clinical success" OR "immunological failure" OR "immunological success" OR "treatment failure" OR "treatment success")                                                                                                                                                                                                                                                                                                                                                                                                                                                                                                                                                                               |
| 5 |                  | 2 OR 3 OR 4                                                                                                                                                                                                                                                                                                                                                                                                                                                                                                                                                                                                                                                                                                                                                                                |
| 6 | HIV/AIDS and ART | (hiv OR ART OR "antiretroviral therapy" OR "triple therapy" OR HAART OR AIDS OR UNAIDS OR "UN targets" OR "HIV Infections" OR HIV OR "human immunodeficiency virus" OR "human immuno deficiency virus" OR "human immune deficiency virus" OR "human immunodeficiency virus" OR "acquired immunodeficiency syndrome" OR "acquired immuno deficiency syndrome" OR "acquired immune deficiency syndrome" OR "acquired immunodeficiency syndrome")                                                                                                                                                                                                                                                                                                                                             |
| 7 | Africa           | (Africa OR "sub-Saharan Africa" OR "list of all African countries")                                                                                                                                                                                                                                                                                                                                                                                                                                                                                                                                                                                                                                                                                                                        |
| 8 |                  | 1 AND 5 AND 6 AND 7 NOT Medline[sb]; Limited by language (English) and year (2003-2020)                                                                                                                                                                                                                                                                                                                                                                                                                                                                                                                                                                                                                                                                                                    |

### *Web of Science searching strategy*

| # | Concept          | Search strategy                                                                                                                                                                                                                                                                                                                                                                                                                                                                                                                                                                                                                                                                                                                                                                              |
|---|------------------|----------------------------------------------------------------------------------------------------------------------------------------------------------------------------------------------------------------------------------------------------------------------------------------------------------------------------------------------------------------------------------------------------------------------------------------------------------------------------------------------------------------------------------------------------------------------------------------------------------------------------------------------------------------------------------------------------------------------------------------------------------------------------------------------|
| 1 | intervention     | TS= (intervention or solution or program or programme or strateg* or polic* or approach or evaluation or promot*)                                                                                                                                                                                                                                                                                                                                                                                                                                                                                                                                                                                                                                                                            |
| 2 | UNAIDS -1        | TS= (“first 90” or “hiv diagnos*” or “hiv test*” or “hiv infection” or test* or diagnose or diagnosis or diagnoses or diagnosed or diagnosing or diagnostic or sero-diagnosis or serodiagnosis or prevent* or screen* or “voluntary counseling” or “voluntary counselling” or counseling or counselling or vct)                                                                                                                                                                                                                                                                                                                                                                                                                                                                              |
| 3 | UNAIDS -2        | TS= (“second 90” or adherence or retention or attrition or compliance or “hiv care” or “ART linkage” or “hiv care link*” or “linkages to care” or LTFU or discontinuation or defaulting or “loss to follow-up” or “loss to follow up” or “lost to follow-up” or “lost to follow up” or “loss-to-follow-up” or “lost-to-follow-up” or “loss to retention” or “lost to retention” or “treatment initiation” or retention or retain* or attrition or link* or “link to care” or “link to treatment” or “linkage to care” or “linkage to treatment” or “link into care” or “linkage into care” or “linkage into care” or “linkage into treatment” or eligibility or eligible or eligib* or adher* or complian* or comply or complied or noncomplian* or non-complian* or non-adher* or nonadher) |
| 4 | UNAIDS -3        | TS= (“third 90” or “viral suppression” or “virological failure” or “clinical failure” or “clinical success” or “immunological failure” or “immunological success” or “treatment failure” or “treatment success”)                                                                                                                                                                                                                                                                                                                                                                                                                                                                                                                                                                             |
| 5 |                  | 2 or 3 or 4                                                                                                                                                                                                                                                                                                                                                                                                                                                                                                                                                                                                                                                                                                                                                                                  |
| 6 | HIV/AIDS and ART | TS= (hiv or ART or “antiretroviral therapy” or “triple therapy” or HAART or AIDS or UNAIDS or “UN targets” or “HIV Infections” or HIV or “human immunodeficiency virus” or “human immuno deficiency virus” or “human immune deficiency virus” or “human immunodeficiency virus” or “acquired immunodeficiency syndrome” or “acquired immuno deficiency syndrome” or “acquired immune deficiency syndrome” or “acquired immunodeficiency syndrome”)                                                                                                                                                                                                                                                                                                                                           |
| 7 | Africa           | TS= (Africa or “sub-Saharan Africa” or “list of all African countries”)                                                                                                                                                                                                                                                                                                                                                                                                                                                                                                                                                                                                                                                                                                                      |
| 8 |                  | 1 and 5 and 6 and 7; Limited by language (English) and year (2003-2020)                                                                                                                                                                                                                                                                                                                                                                                                                                                                                                                                                                                                                                                                                                                      |

### Scopus searching strategy

| #  | Concept          | Search strategy                                                                                                                                                                                                                                                                                                                                                                                                                                                                                                                                                                                                                                                                                                                                                                             |
|----|------------------|---------------------------------------------------------------------------------------------------------------------------------------------------------------------------------------------------------------------------------------------------------------------------------------------------------------------------------------------------------------------------------------------------------------------------------------------------------------------------------------------------------------------------------------------------------------------------------------------------------------------------------------------------------------------------------------------------------------------------------------------------------------------------------------------|
| 1  | intervention     | ALL (intervention OR solution OR program OR programme OR strateg* OR polic* OR approach OR evaluation OR promot*)                                                                                                                                                                                                                                                                                                                                                                                                                                                                                                                                                                                                                                                                           |
| 2  | UNAIDS -1        | ALL (“first 90” OR “hiv diagnos*” OR “hiv test*” OR “hiv infection” OR test* OR diagnose OR diagnosis OR diagnoses OR diagnosed OR diagnosing OR diagnostic OR sero-diagnosis OR serodiagnosis OR prevent* OR screen* OR “voluntary counseling” OR “voluntary counselling” OR counseling OR counselling OR vct)                                                                                                                                                                                                                                                                                                                                                                                                                                                                             |
| 3  | UNAIDS -2        | ALL (“second 90” OR adherence OR retention OR attrition OR compliance OR “hiv care” OR “ART linkage” OR “hiv care link*” OR “linkages to care” OR LTFU OR discontinuation OR defaulting OR “loss to follow-up” OR “loss to follow up” OR “lost to follow-up” OR “lost to follow up” OR “loss-to-follow-up” OR “lost-to-follow-up” OR “loss to retention” OR “lost to retention” OR “treatment initiation” OR retention OR retain* OR attrition OR link* OR “link to care” OR “link to treatment” OR “linkage to care” OR “linkage to treatment” OR “link into care” OR “linkage into care” OR “linkage into care” OR “linkage into treatment” OR eligibility OR eligible OR eligib* OR adher* OR complian* OR comply OR complied OR noncomplan* OR non-complian* OR non-adher* OR nonadher) |
| 4  | UNAIDS -3        | ALL (“third 90” OR “viral suppression” OR “virological failure” OR “clinical failure” OR “clinical success” OR “immunological failure” OR “immunological success” OR “treatment failure” OR “treatment success”)                                                                                                                                                                                                                                                                                                                                                                                                                                                                                                                                                                            |
| 5  |                  | 2 OR 3 OR 4                                                                                                                                                                                                                                                                                                                                                                                                                                                                                                                                                                                                                                                                                                                                                                                 |
| 6  | HIV/AIDS and ART | ALL (hiv OR ART OR “antiretroviral therapy” OR “triple therapy” OR HAART OR AIDS OR UNAIDS OR “UN targets” OR “HIV Infections” OR HIV OR “human immunodeficiency virus” OR “human immuno deficiency virus” OR “human immune deficiency virus” OR “human immunodeficiency virus” OR “acquired immunodeficiency syndrome” OR “acquired immuno deficiency syndrome” OR “acquired immune deficiency syndrome” OR “acquired immunodeficiency syndrome”)                                                                                                                                                                                                                                                                                                                                          |
| 7  | Africa           | ALL (Africa OR “sub-Saharan Africa” OR “list of all African countries”)                                                                                                                                                                                                                                                                                                                                                                                                                                                                                                                                                                                                                                                                                                                     |
| 87 |                  | 1 AND 5 AND 6 AND 7; Limited Subject area medicine/sociology/psychology AND English; LIMITED to English; LIMITED to year (2003-2020)                                                                                                                                                                                                                                                                                                                                                                                                                                                                                                                                                                                                                                                        |

**CINAHL Searching strategy\***

| #  | Concept          | Search strategy                                                                                                                                                                                                                                                                                                                                                                                                                                                                                                                                                                                                                                                                                                                                                                      |
|----|------------------|--------------------------------------------------------------------------------------------------------------------------------------------------------------------------------------------------------------------------------------------------------------------------------------------------------------------------------------------------------------------------------------------------------------------------------------------------------------------------------------------------------------------------------------------------------------------------------------------------------------------------------------------------------------------------------------------------------------------------------------------------------------------------------------|
| S1 | intervention     | intervention or solution or program or programme or strateg* or polic* or approach or evaluation or promot*                                                                                                                                                                                                                                                                                                                                                                                                                                                                                                                                                                                                                                                                          |
| S2 | UNAIDS -1        | “first 90” or “hiv diagnos*” or “hiv test*” or “hiv infection” or test* or diagnose or diagnosis or diagnoses or diagnosed or diagnosing or diagnostic or sero-diagnosis or serodiagnosis or prevent* or screen* or “voluntary counseling” or “voluntary counselling” or counseling or counselling or vct                                                                                                                                                                                                                                                                                                                                                                                                                                                                            |
| S3 | UNAIDS -2        | “second 90” or adherence or retention or attrition or compliance or “hiv care” or “ART linkage” or “hiv care link*” or “linkages to care” or LTFU or discontinuation or defaulting or “loss to follow-up” or “loss to follow up” or “lost to follow-up” or “lost to follow up” or “loss-to-follow-up” or “lost-to-follow-up” or “loss to retention” or “lost to retention” or “treatment initiation” or retention or retain* or attrition or link* or “link to care” or “link to treatment” or “linkage to care” or “linkage to treatment” or “link into care” or “linkage into care” or “linkage into care” or “linkage into treatment” or eligibility or eligible or eligib* or adher* or complian* or comply or complied or noncomplan* or non-complan* or non-adher* or nonadher |
| S4 | UNAIDS -3        | “third 90” or “viral suppression” or “virological failure” or “clinical failure” or “clinical success” or “immunological failure” or “immunological success” or “treatment failure” or “treatment success”                                                                                                                                                                                                                                                                                                                                                                                                                                                                                                                                                                           |
| S5 |                  | S2 or S3 or S4                                                                                                                                                                                                                                                                                                                                                                                                                                                                                                                                                                                                                                                                                                                                                                       |
| S6 | HIV/AIDS and ART | hiv or ART or “antiretroviral therapy” or “triple therapy” or HAART or AIDS or UNAIDS or “UN targets” or “HIV Infections” or HIV or “human immunodeficiency virus” or “human immuno deficiency virus” or “human immune deficiency virus” or “human immunodeficiency virus” or “acquired immunodeficiency syndrome” or “acquired immuno deficiency syndrome” or “acquired immune deficiency syndrome” or “acquired immunodeficiency syndrome”                                                                                                                                                                                                                                                                                                                                         |
| S7 | Africa           | Africa or “sub-Saharan Africa” or “list of all African countries”                                                                                                                                                                                                                                                                                                                                                                                                                                                                                                                                                                                                                                                                                                                    |
| S8 |                  | S1 and S5 and S6 and S7; Limited by language (English) and year (2003-2020)                                                                                                                                                                                                                                                                                                                                                                                                                                                                                                                                                                                                                                                                                                          |

Supplementary material 2: JBI Critical Appraisal instruments

**JBI Critical Appraisal Checklist for Comparable Cohort/ Case Control**

Reviewer ..... Date .....

Author ..... Year ..... Record Number .....

|                                                                                     | Yes                      | No                       | Unclear                  | Not Applicable           |
|-------------------------------------------------------------------------------------|--------------------------|--------------------------|--------------------------|--------------------------|
| 1. Is sample representative of patients in the population as a whole?               | <input type="checkbox"/> | <input type="checkbox"/> | <input type="checkbox"/> | <input type="checkbox"/> |
| 2. Are the patients at a similar point in the course of their condition/illness?    | <input type="checkbox"/> | <input type="checkbox"/> | <input type="checkbox"/> | <input type="checkbox"/> |
| 3. Has bias been minimised in relation to selection of cases and of controls?       | <input type="checkbox"/> | <input type="checkbox"/> | <input type="checkbox"/> | <input type="checkbox"/> |
| 4. Are confounding factors identified and strategies to deal with them stated?      | <input type="checkbox"/> | <input type="checkbox"/> | <input type="checkbox"/> | <input type="checkbox"/> |
| 5. Are outcomes assessed using objective criteria?                                  | <input type="checkbox"/> | <input type="checkbox"/> | <input type="checkbox"/> | <input type="checkbox"/> |
| 6. Was follow up carried out over a sufficient time period?                         | <input type="checkbox"/> | <input type="checkbox"/> | <input type="checkbox"/> | <input type="checkbox"/> |
| 7. Were the outcomes of people who withdrew described and included in the analysis? | <input type="checkbox"/> | <input type="checkbox"/> | <input type="checkbox"/> | <input type="checkbox"/> |
| 8. Were outcomes measured in a reliable way?                                        | <input type="checkbox"/> | <input type="checkbox"/> | <input type="checkbox"/> | <input type="checkbox"/> |
| 9. Was appropriate statistical analysis used?                                       | <input type="checkbox"/> | <input type="checkbox"/> | <input type="checkbox"/> | <input type="checkbox"/> |

Overall appraisal:      Include                   Exclude                   Seek further info.

Comments (Including reason for exclusion)

---



---



---

## Supplementary material 3: Tool to Assess Risk of Bias in Cohort Studies

### Tool to Assess Risk of Bias in Cohort Studies

#### 1. Was selection of exposed and non-exposed cohorts drawn from the same population?

|                                      |              |             |                                      |
|--------------------------------------|--------------|-------------|--------------------------------------|
| Definitely yes<br>(low risk of bias) | Probably yes | Probably no | Definitely no<br>(high risk of bias) |
|--------------------------------------|--------------|-------------|--------------------------------------|

Examples of low risk of bias: Exposed and unexposed drawn from same administrative data base of patients presenting at same points of care over the same time frame

Examples of high risk of bias: exposed and unexposed presenting to different points of care or over a different time frame

#### 2. Can we be confident in the assessment of exposure?

|                                      |              |             |                                      |
|--------------------------------------|--------------|-------------|--------------------------------------|
| Definitely yes<br>(low risk of bias) | Probably yes | Probably no | Definitely no<br>(high risk of bias) |
|--------------------------------------|--------------|-------------|--------------------------------------|

Examples of low risk of bias: Secure record [e.g. surgical records, pharmacy records]; Repeated interview or other ascertainment asking about current use/exposure

Examples of higher risk of bias: Structured interview at a single point in time; Written self report; Individuals who are asked to retrospectively confirm their exposure status may be subject to recall bias – less likely to recall an exposure if they have not developed an adverse outcome, and more likely to recall an exposure (whether an exposure occurred or not) if they have developed an adverse outcome.

Examples of high risk of bias: uncertain how exposure information obtained

#### 3. Can we be confident that the outcome of interest was not present at start of study

|                                      |              |             |                                      |
|--------------------------------------|--------------|-------------|--------------------------------------|
| Definitely yes<br>(low risk of bias) | Probably yes | Probably no | Definitely no<br>(high risk of bias) |
|--------------------------------------|--------------|-------------|--------------------------------------|

#### 4. Did the study match exposed and unexposed for all variables that are associated with the outcome of interest or did the statistical analysis adjust for these prognostic variables?

|                                      |            |           |                                      |
|--------------------------------------|------------|-----------|--------------------------------------|
| Definitely yes<br>(low risk of bias) | Mostly yes | Mostly no | Definitely no<br>(high risk of bias) |
|--------------------------------------|------------|-----------|--------------------------------------|

Examples of low risk of bias: comprehensive matching or adjustment for all plausible prognostic variables

Examples of higher risk of bias: matching or adjustment for most plausible prognostic variables

Examples of high risk of bias: matching or adjustment for a minority of plausible prognostic variables, or no matching or adjustment at all. Statements of no differences between groups or that differences were not statistically significant are not sufficient for establishing comparability.

#### 5. Can we be confident in the assessment of the presence or absence of prognostic factors?

|                                      |              |             |                                      |
|--------------------------------------|--------------|-------------|--------------------------------------|
| Definitely yes<br>(low risk of bias) | Probably yes | Probably no | Definitely no<br>(high risk of bias) |
|--------------------------------------|--------------|-------------|--------------------------------------|

Examples of low risk of bias: Interview of all participants; self-completed survey from all participants; review of charts with reproducibility demonstrated; from data base with documentation of accuracy of abstraction of prognostic data

Examples of higher risk of bias: Chart review without demonstration of reproducibility; data base with uncertain quality of abstraction of prognostic information

Examples of high risk of bias: Prognostic information from data base with no available documentation of quality of abstraction of prognostic variables

## 6. Can we be confident in the assessment of outcome?

Definitely yes  
(low risk of bias)

Probably yes

Probably no

Definitely no  
(high risk of bias)

Examples of low risk of bias: Independent blind assessment; Record linkage; For some outcomes (e.g. fractured hip), reference to the medical record is sufficient to satisfy the requirement for confirmation of the fracture.

Examples of higher risk of bias: Independent assessment unblinded; self-report; For some outcomes (e.g. vertebral fracture where reference to x-rays would be required) reference to the medical record would not be adequate outcomes.

Examples of high risk of bias: uncertain (no description)

## 7. Was the follow up of cohorts adequate?

Definitely yes  
(low risk of bias)

Probably yes

Probably no

Definitely no  
(high risk of bias)

Examples of low risk of bias: No missing outcome data; Reasons for missing outcome data unlikely to be related to true outcome (for survival data, censoring is unlikely to introduce bias); Missing outcome data balanced in numbers across intervention groups, with similar reasons for missing data across groups; For dichotomous outcome data, the proportion of missing outcomes compared with observed event risk is not enough to have an important impact on the intervention effect estimate; For continuous outcome data, plausible effect size (difference in means or standardized difference in means) among missing outcomes is not large enough to have an important impact on the observed effect size; Missing data have been imputed using appropriate methods.

Examples of high risk of bias: Reason for missing outcome data likely to be related to true outcome, with either imbalance in numbers or reasons for missing data across intervention groups; For dichotomous outcome data, the proportion of missing outcomes compared with observed event risk is enough to induce important bias in intervention effect estimate; For continuous outcome data, plausible effect size (difference in means or standardized difference in means) among missing outcomes is large enough to induce clinically relevant bias in the observed effect size.

## 8. Were co-interventions similar between groups?

Definitely yes  
(low risk of bias)

Probably yes

Probably no

Definitely no  
(high risk of bias)

Examples of low risk of bias: Most or all relevant co-interventions that might influence the outcome of interest are documented to be similar in the exposed and unexposed.

Examples of high risk of bias: Few or no relevant co-interventions that might influence the outcome of interest are documented to be similar in the exposed and unexposed.



Supplementary material 4: JBI Data extraction instruments

**JBI Data Extraction Form for  
Experimental / Observational Studies**

Reviewer ..... Date .....

Author ..... Year .....

Journal ..... Record Number .....

**Study Method**

RCT                       Quasi-RCT                       Longitudinal   
Retrospective                       Observational                       Other

**Participants**

Setting \_\_\_\_\_

Population \_\_\_\_\_

**Sample size**

Group A \_\_\_\_\_ Group B \_\_\_\_\_

**Interventions**

Intervention A \_\_\_\_\_

Intervention B \_\_\_\_\_

Authors Conclusions:  
\_\_\_\_\_  
\_\_\_\_\_  
\_\_\_\_\_

Reviewers Conclusions:  
\_\_\_\_\_  
\_\_\_\_\_  
\_\_\_\_\_

**Study results**

**Dichotomous data**

| <b>Outcome</b> | <b>Intervention ( )<br/>number / total number</b> | <b>Intervention ( )<br/>number / total number</b> |
|----------------|---------------------------------------------------|---------------------------------------------------|
|                |                                                   |                                                   |
|                |                                                   |                                                   |
|                |                                                   |                                                   |
|                |                                                   |                                                   |

**Continuous data**

| <b>Outcome</b> | <b>Intervention ( )<br/>number / total number</b> | <b>Intervention ( )<br/>number / total number</b> |
|----------------|---------------------------------------------------|---------------------------------------------------|
|                |                                                   |                                                   |
|                |                                                   |                                                   |
|                |                                                   |                                                   |
|                |                                                   |                                                   |

## Supplementary material 5: PRISMA-P (Preferred Reporting Items for Systematic review and Meta-Analysis Protocols) 2015 checklist

| Section and topic                 | Item No | Checklist item                                                                                                                                                                                                                    |
|-----------------------------------|---------|-----------------------------------------------------------------------------------------------------------------------------------------------------------------------------------------------------------------------------------|
| <b>ADMINISTRATIVE INFORMATION</b> |         |                                                                                                                                                                                                                                   |
| Title:                            |         |                                                                                                                                                                                                                                   |
| Identification                    | 1a      | Identify the report as a protocol of a systematic review: 1                                                                                                                                                                       |
| Update                            | 1b      | If the protocol is for an update of a previous systematic review, identify as such NA                                                                                                                                             |
| Registration                      | 2       | If registered, provide the name of the registry (such as PROSPERO) and registration number: 2 and 5, CRD42019135135                                                                                                               |
| Authors:                          |         |                                                                                                                                                                                                                                   |
| Contact                           | 3a      | Provide name, institutional affiliation, e-mail address of all protocol authors; provide physical mailing address of corresponding author 1                                                                                       |
| Contributions                     | 3b      | Describe contributions of protocol authors and identify the guarantor of the review 10                                                                                                                                            |
| Amendments                        | 4       | If the protocol represents an amendment of a previously completed or published protocol, identify as such and list changes; otherwise, state plan for documenting important protocol amendments NA                                |
| Support:                          |         |                                                                                                                                                                                                                                   |
| Sources                           | 5a      | Indicate sources of financial or other support for the review 10                                                                                                                                                                  |
| Sponsor                           | 5b      | Provide name for the review funder and/or sponsor 10                                                                                                                                                                              |
| Role of sponsor or funder         | 5c      | Describe roles of funder(s), sponsor(s), and/or institution(s), if any, in developing the protocol 10                                                                                                                             |
| <b>INTRODUCTION</b>               |         |                                                                                                                                                                                                                                   |
| Rationale                         | 6       | Describe the rationale for the review in the context of what is already known 3-5                                                                                                                                                 |
| Objectives                        | 7       | Provide an explicit statement of the question(s) the review will address with reference to participants, interventions, comparators, and outcomes (PICO) 5-6                                                                      |
| <b>METHODS</b>                    |         |                                                                                                                                                                                                                                   |
| Eligibility criteria              | 8       | Specify the study characteristics (such as PICO, study design, setting, time frame) and report characteristics (such as years considered, language, publication status) to be used as criteria for eligibility for the review 5-6 |
| Information sources               | 9       | Describe all intended information sources (such as electronic databases, contact with study authors, trial registers or other grey literature sources) with planned dates of coverage 5-7                                         |

|                                    |     |                                                                                                                                                                                                                                                      |
|------------------------------------|-----|------------------------------------------------------------------------------------------------------------------------------------------------------------------------------------------------------------------------------------------------------|
| Search strategy                    | 10  | Present draft of search strategy to be used for at least one electronic database, including planned limits, such that it could be repeated 7                                                                                                         |
| Study records:                     |     |                                                                                                                                                                                                                                                      |
| Data management                    | 11a | Describe the mechanism(s) that will be used to manage records and data throughout the review 7-8                                                                                                                                                     |
| Selection process                  | 11b | State the process that will be used for selecting studies (such as two independent reviewers) through each phase of the review (that is, screening, eligibility and inclusion in meta-analysis) 7-8                                                  |
| Data collection process            | 11c | Describe planned method of extracting data from reports (such as piloting forms, done independently, in duplicate), any processes for obtaining and confirming data from investigators 8                                                             |
| Data items                         | 12  | List and define all variables for which data will be sought (such as PICO items, funding sources), any pre-planned data assumptions and simplifications 6                                                                                            |
| Outcomes and prioritization        | 13  | List and define all outcomes for which data will be sought, including prioritization of main and additional outcomes, with rationale 6                                                                                                               |
| Risk of bias in individual studies | 14  | Describe anticipated methods for assessing risk of bias of individual studies, including whether this will be done at the outcome or study level, or both; state how this information will be used in data synthesis 7-8                             |
| Data synthesis                     | 15a | Describe criteria under which study data will be quantitatively synthesised 8-9                                                                                                                                                                      |
|                                    | 15b | If data are appropriate for quantitative synthesis, describe planned summary measures, methods of handling data and methods of combining data from studies, including any planned exploration of consistency (such as $I^2$ , Kendall's $\tau$ ) 8-9 |
|                                    | 15c | Describe any proposed additional analyses (such as sensitivity or subgroup analyses, meta-regression) 8-9                                                                                                                                            |
|                                    | 15d | If quantitative synthesis is not appropriate, describe the type of summary planned 8                                                                                                                                                                 |
| Meta-bias(es)                      | 16  | Specify any planned assessment of meta-biases (such as publication bias across studies, selective reporting within studies) 9                                                                                                                        |
| Confidence in cumulative evidence  | 17  | Describe how the strength of the body of evidence will be assessed (such as GRADE) 9                                                                                                                                                                 |

**\* It is strongly recommended that this checklist be read in conjunction with the PRISMA-P Explanation and Elaboration (cite when available) for important clarification on the items. Amendments to a review protocol should be tracked and dated. The copyright for PRISMA-P (including checklist) is held by the PRISMA-P Group and is distributed under a Creative Commons Attribution Licence 4.0.**

*From: Shamseer L, Moher D, Clarke M, Ghersi D, Liberati A, Petticrew M, Shekelle P, Stewart L, PRISMA-P Group. Preferred reporting items for systematic review and meta-analysis protocols (PRISMA-P) 2015: elaboration and explanation. BMJ. 2015 Jan 2;349(jan02 1): g7647.*
